# Supplementary material
Source: PubMed Central journal article supplement (PMC2805499)
Supplement: jc.2009-1769_2.pdf [file jc.2009-1769_2.pdf]

**Supplemental Table 1. Subject characteristics before hormonal intervention**

|                          | PRE                              |                                  | POST                             |                                  | P value* |                |                    |
|--------------------------|----------------------------------|----------------------------------|----------------------------------|----------------------------------|----------|----------------|--------------------|
|                          | E <sub>2</sub> -deplete (N = 10) | E <sub>2</sub> -replete (N = 10) | E <sub>2</sub> -deplete (N = 12) | E <sub>2</sub> -replete (N = 10) | Age      | E <sub>2</sub> | Age*E <sub>2</sub> |
| Age (years)              | 23 ± 0.62                        | 25 ± 1.1                         | 63 ± 2.2                         | 64 ± 1.4                         | < 0.001  | —              | —                  |
| BMI (kg/m <sup>2</sup> ) | 26 ± 0.75                        | 23 ± 0.97                        | 25 ± 1.1                         | 26 ± 1.2                         | 0.22     | 0.34           | 0.12               |
| AVF (cm <sup>2</sup> )   | 40 ± 6.6                         | 21 ± 2.7                         | 89 ± 16                          | 60 ± 8.5                         | < 0.001  | 0.026          | 0.66               |
| FSH (IU/L)               | 5.0 ± 0.90                       | 3.6 ± 0.56                       | 87 ± 8.0                         | 72 ± 7.4                         | < 0.001  | 0.093          | 0.96               |
| LH (IU/L)                | 5.2 ± 1.3                        | 5.2 ± 0.94                       | 34 ± 3.1                         | 42 ± 3.7                         | < 0.001  | 0.081          | 0.68               |
| E <sub>2</sub> (pg/mL)   | 77 ± 11                          | 106 ± 29                         | < 35                             | < 35                             | < 0.001  | 0.32           | 0.32               |
| T (ng/dL)                | 29 ± 2.6                         | 31 ± 5.9                         | 19 ± 4.1                         | 21 ± 3.8                         | 0.024    | 0.64           | 0.92               |
| SHBG (nmol/L)            | 73 ± 16                          | 92 ± 15                          | 46 ± 7.4                         | 71 ± 13                          | 0.74     | 0.11           | 0.82               |
| Prolactin (µg/L)         | 9.1 ± 1.5                        | 13 ± 1.9                         | 6.6 ± 0.54                       | 7.5 ± 0.36                       | 0.001    | 0.044          | 0.19               |
| IGF-I (µg/L)             | 405 ± 23                         | 484 ± 45                         | 214 ± 23                         | 207 ± 26                         | < 0.001  | 0.28           | 0.2                |
| IGFBP-1 (µg/L)           | 9.5 ± 2.3                        | 16 ± 3.8                         | 20 ± 5.2                         | 27 ± 5.0                         | 0.015    | 0.12           | 0.95               |

|                             |                 |                |                |                 |         |      |      |
|-----------------------------|-----------------|----------------|----------------|-----------------|---------|------|------|
| IGFBP-3 ( $\mu\text{g/L}$ ) | 5439 $\pm$ 218  | 5604 $\pm$ 255 | 4466 $\pm$ 364 | 4662 $\pm$ 176  | < 0.001 | 0.52 | 0.95 |
| Albumin (g/L)               | 4.6 $\pm$ 0.056 | 4.6 $\pm$ 0.10 | 4.3 $\pm$ 0.59 | 4.3 $\pm$ 0.039 | < 0.001 | 0.73 | 0.79 |

---

\*P value for main effect or interaction via 2-way ANOVA.

Data are the mean  $\pm$  SEM for *N* as indicated.

Age\*E<sub>2</sub> denotes age-by-estrogen interaction.

Multiply E<sub>2</sub> concentration by 3.68 to convert pg/mL to pmol/L.

Multiply T concentration by 0.0347 to convert ng/dL to nmol/L.

E<sub>2</sub> and T were determined by immunoassay.
