# Supplementary material
Source: PubMed Central journal article supplement (PMC2805499)
Supplement: jc.2009-1769_3.pdf [file jc.2009-1769_3.pdf]

**Supplemental Table 2. Hormonal data after intervention**

|                        | PRE                              |                                  | POST                             |                                  | P value |                |                    |
|------------------------|----------------------------------|----------------------------------|----------------------------------|----------------------------------|---------|----------------|--------------------|
|                        | E <sub>2</sub> -deplete (N = 10) | E <sub>2</sub> -replete (N = 10) | E <sub>2</sub> -deplete (N = 12) | E <sub>2</sub> -replete (N = 10) | Age     | E <sub>2</sub> | Age*E <sub>2</sub> |
| FSH (IU/L)             | 2.8 ± 0.47                       | 0.61 ± 0.12                      | 8.2 ± 1.2                        | 2.0 ± 0.43                       | < 0.001 | < 0.001        | 0.012              |
| LH (IU/L)              | 0.64 ± 0.19                      | 1.4 ± 0.37                       | 1.0 ± 0.16                       | 0.95 ± 0.11                      | 0.96    | 0.16           | 0.084              |
| E <sub>2</sub> (pg/mL) | 11 ± 1.3                         | 150 ± 7.3                        | 8.8 ± 1.1                        | 136 ± 10                         | 0.034   | < 0.001        | 0.13               |
| T (ng/dL)              | 18 ± 1.8                         | 15 ± 0.95                        | 13 ± 1.6                         | 10 ± 1.2                         | 0.041   | 0.047          | 0.73               |
| SHBG (nmol/L)          | 43 ± 6.1                         | 72 ± 13                          | 50 ± 6.6                         | 69 ± 12                          | 0.81    | 0.018          | 0.64               |
| IGF-I (µg/L)           | 352 ± 29                         | 418 ± 46                         | 187 ± 24                         | 176 ± 24                         | < 0.001 | 0.42           | 0.25               |
| IGFBP-I (µg/L)         | 14 ± 2.3                         | 28 ± 6.4                         | 22 ± 2.5                         | 38 ± 6.6                         | 0.076   | 0.003          | 0.84               |
| IGFBP-3 (µg/L)         | 5081 ± 287                       | 4840 ± 263                       | 4100 ± 233                       | 3411 ± 173                       | < 0.001 | 0.064          | 0.36               |
| Albumin (g/L)          | 4.3 ± 0.097                      | 4.6 ± 0.096                      | 4.0 ± 0.077                      | 4.3 ± 0.039                      | 0.005   | 0.001          | 0.98               |

Data are the mean ± SEM. Age\*E<sub>2</sub> represents age-by-E<sub>2</sub> interaction.

See footnotes in Table 1. E<sub>2</sub> and T were determined by mass spectrometry.
