# Supplementary material
Source: PubMed Central journal article supplement (PMC2805499)
Supplement: jc.2009-1769_4.pdf [file jc.2009-1769_4.pdf]

**Supplemental Table 3. Summary of three-way ANCOVA results (N = 42)**

|                     | <u>Pulsatile</u> | <u>Mass per Burst</u> |
|---------------------|------------------|-----------------------|
| Age                 | < 0.001          | < 0.001               |
| E <sub>2</sub>      | 0.001            | 0.002                 |
| Secretagogue        | < 0.001          | < 0.001               |
| Age*E <sub>2</sub>  | 0.47             | 0.39                  |
| Secr*age            | 0.16             | 0.051                 |
| Secr*E <sub>2</sub> | 0.28             | 0.34                  |

---

Data are P values for primary effects and for age-by-E<sub>2</sub> (Age\*E<sub>2</sub>), secretagogue-by-age (Secr\*age) and secretagogue-by-E<sub>2</sub> (Secr\*E<sub>2</sub>) interactions. Columns give GH characteristics.
