# Supplementary material
Source: PubMed Central journal article supplement (PMC2805499)
Supplement: jc.2009-1769_5.pdf [file jc.2009-1769_5.pdf]

**Supplemental Table 4. Linear contrasts by age for any given peptide type and E<sub>2</sub> status**

|                               | <u>Pulsatile</u> | <u>Mass per Burst</u> |
|-------------------------------|------------------|-----------------------|
| GHRH/E <sub>2</sub> deplete   | 0.40             | 0.89                  |
| GHRH/E <sub>2</sub> replete   | 0.012            | 0.79                  |
| GHRP-2/E <sub>2</sub> deplete | 0.011            | 0.020                 |
| GHRP-2/E <sub>2</sub> replete | 0.011            | 0.014                 |

---

See legend of Supplemental Table 3.
