# Supplementary material
Source: PubMed Central journal article supplement (PMC2805499)

# Pre- and Postmenopausal GH-Secretory Bursts

*GHRH: Leuprolide Low-E<sub>2</sub> Clamp*

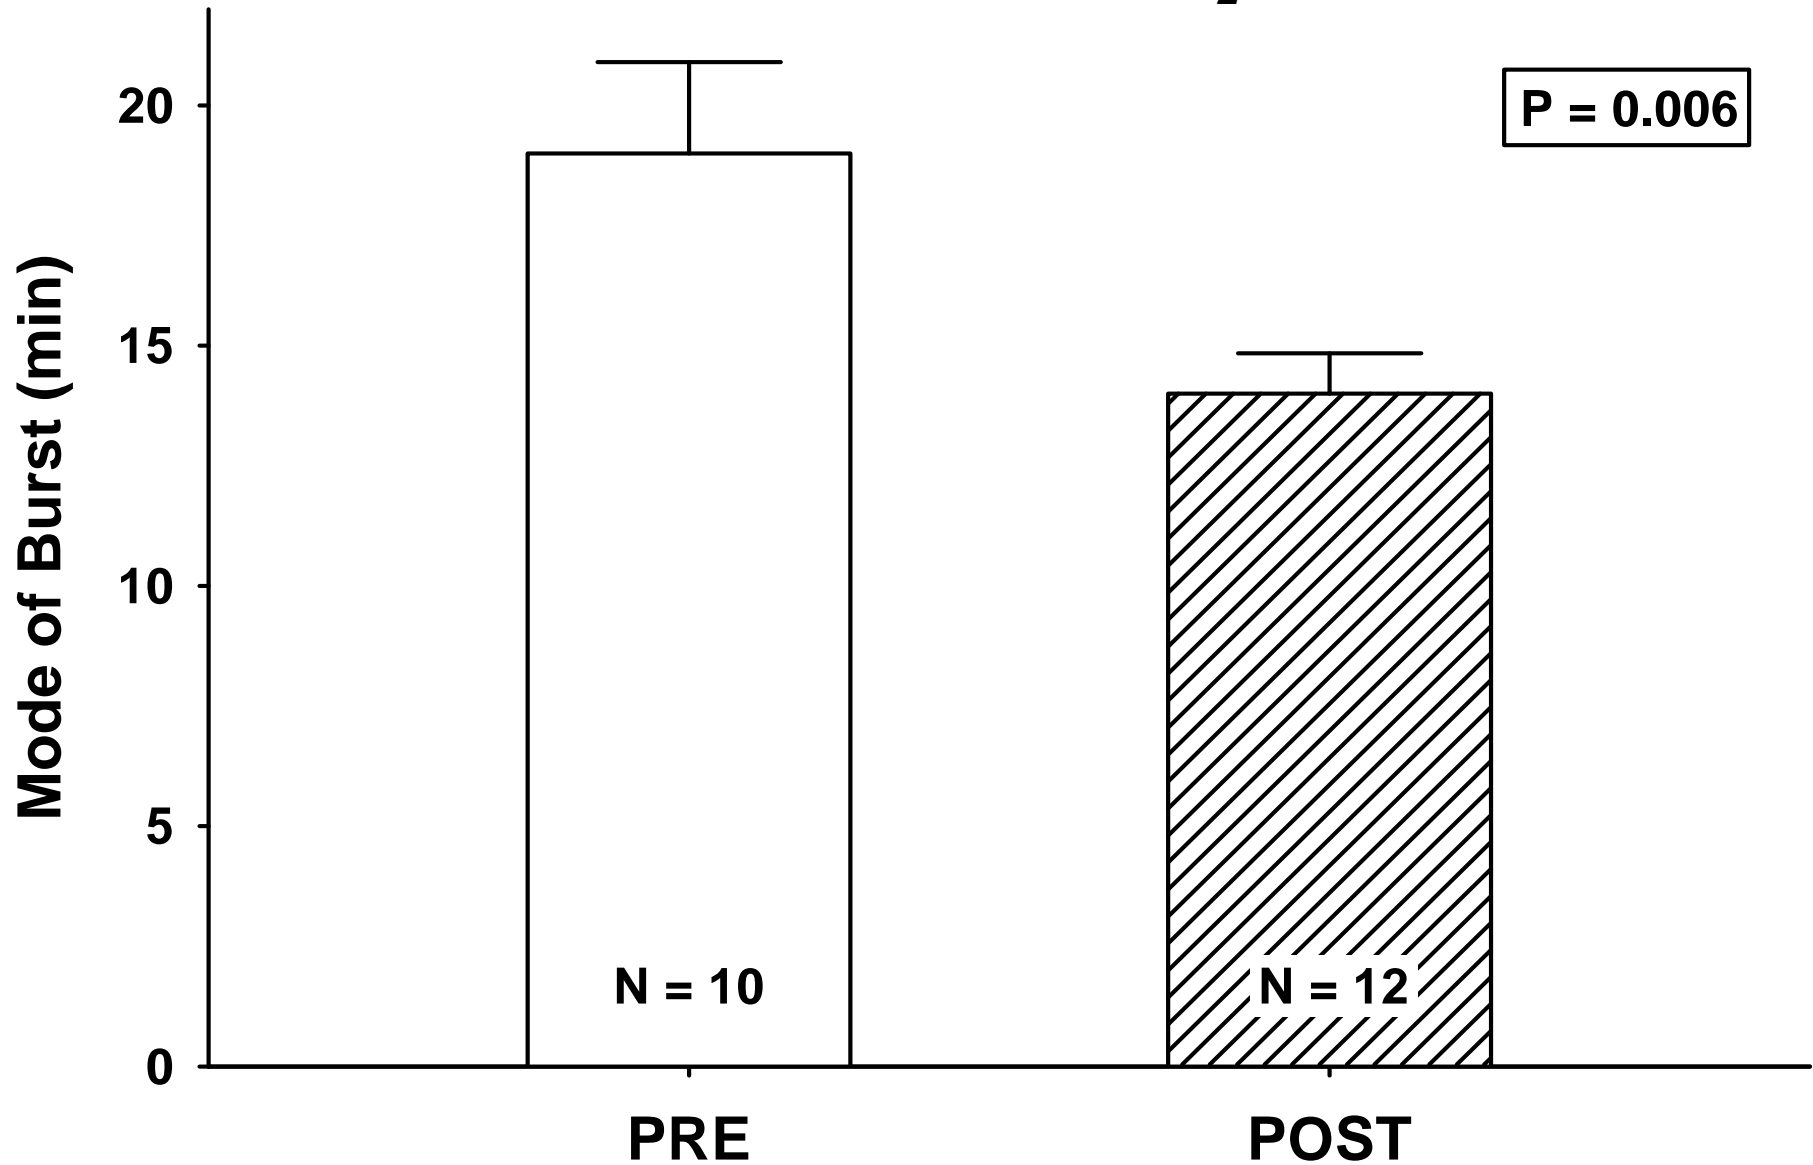

Supplement: jc.2009-1769_1.pdf [file jc.2009-1769_1.pdf]
